# Supplementary material for: Effect of aging on the human myometrium at single-cell resolution
Source: PubMed Central journal article supplement (PMC10830479; doi:10.1038/s41467-024-45143-z), 2024-01-31
Supplement: 41467_2024_45143_MOESM3_ESM.pdf [file 41467_2024_45143_MOESM3_ESM.pdf]

## **Description of Additional Supplementary Files**

**Supplementary Data 1.** Excel file containing epidemiological, demographic, and clinicopathological outcomes of perimenopausal (n=6) and postmenopausal (n=14) women included in the study.

**Supplementary Data 2.** Excel file containing run summary metrics of single-cell libraries in the menopausal human myometrium.

**Supplementary Data 3.** Excel file containing descriptive statistics of marker genes associated with endothelial subclusters.

**Supplementary Data 4.** Excel file containing differentially expressed genes in endothelial subclusters during myometrial aging.

**Supplementary Data 5.** Excel file containing descriptive statistics of marker genes associated with fibroblast subclusters.

**Supplementary Data 6.** Excel file containing differentially expressed genes between fibroblasts subclusters during myometrial aging.

**Supplementary Data 7.** Excel file containing descriptive statistics of marker genes associated with SMC subclusters.

**Supplementary Data 8.** Excel file containing differentially expressed genes between smooth muscle subclusters during myometrial aging.

**Supplementary Data 9.** Excel file containing descriptive statistics of marker genes associated with PV subclusters.

**Supplementary Data 10.** Excel file containing differentially expressed genes between PV subclusters during myometrial aging.

**Supplementary Data 11.** Excel file containing descriptive statistics of marker genes associated with immune subclusters.

**Supplementary Data 12.** Excel file containing differentially expressed genes between immune subclusters during myometrial aging.

**Supplementary Data 13.** Excel file containing relative contributions of ligands and receptors to signaling pathways during myometrial aging.

**Supplementary Data 14.** Excel file containing cell counts split by patient, cell type and menopausal stage.
